# Supplementary material for: miR-21 is upregulated, promoting fibrosis and blocking G2/M in irradiated rat cardiac fibroblasts
Source: PeerJ journal article supplement (doi:10.7717/peerj.10502), 2020-12-10

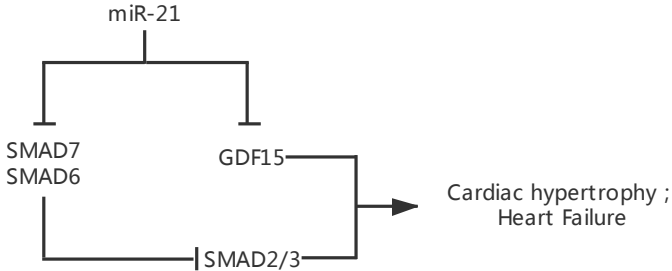

Supplement: Supplement_4.pdf [file Supplement_4.pdf]
